# Supplementary material
Source: PubMed Central journal article supplement (PMC9994602)
Supplement: NIHMS1874605-supplement-Supplementary.pdf [file NIHMS1874605-supplement-Supplementary.pdf]

## Supplemental Information

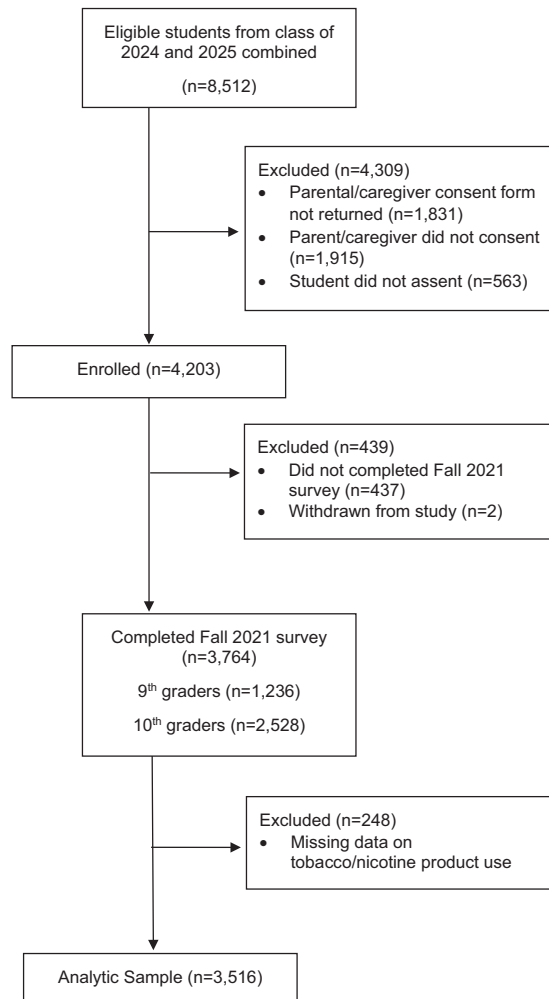

### SUPPLEMENTAL FIGURE 3

Consort diagram.

**SUPPLEMENTAL TABLE 4** Sociodemographic Correlates of Past 6-Month Use of Any Non-Tobacco Oral Nicotine Product among 3,516 Adolescents in Southern California Between September and December 2021

| Sociodemographic Factor                    | No. (%) Oral Nicotine Product Use <sup>a</sup> | Unadjusted Prevalence Difference (95% CI) | Unadjusted OR (95% CI) <sup>b</sup> | Adjusted OR (95% CI) <sup>b,c</sup> |
|--------------------------------------------|------------------------------------------------|-------------------------------------------|-------------------------------------|-------------------------------------|
| High school grade                          |                                                |                                           |                                     |                                     |
| 9 <sup>th</sup> grade                      | 9 (0.8)                                        | Ref.                                      | Ref.                                | Ref.                                |
| 10 <sup>th</sup> grade                     | 50 (2.1)                                       | 1.3 (0.5 to 2.1)                          | 2.54 (1.21 to 5.35)                 | 2.61 (1.20 to 5.67)                 |
| Race and ethnicity                         |                                                |                                           |                                     |                                     |
| Hispanic                                   | 42 (2.5)                                       | 1.8 (0.9 to 2.8)                          | 3.57 (1.38 to 9.18)                 | 4.10 (1.36 to 12.32)                |
| Asian                                      | 12 (1.1)                                       | 0.4 (−0.5 to 1.2)                         | 1.86 (0.62 to 5.57)                 | 2.83 (0.82 to 9.78)                 |
| All other races                            | 5 (0.7)                                        | Ref.                                      | Ref.                                | Ref.                                |
| Parental education                         |                                                |                                           |                                     |                                     |
| Less than high school                      | 10 (3.9)                                       | 2.5 (0.1 to 5.0)                          | 2.76 (1.26 to 6.03)                 | 2.14 (0.96 to 4.74)                 |
| High school                                | 10 (2.3)                                       | 0.9 (−0.6 to 2.4)                         | 1.51 (0.70 to 3.26)                 | 1.29 (0.59 to 2.81)                 |
| Some college or college degree             | 21 (1.4)                                       | Ref.                                      | Ref.                                | Ref.                                |
| Advanced degree                            | 9 (1.2)                                        | −0.2 (−1.1 to 0.8)                        | 0.95 (0.43 to 2.1)                  | 1.09 (0.49 to 2.42)                 |
| Don't know                                 | 6 (1.5)                                        | 0.1 (−1.2 to 1.5)                         | 1.13 (0.45 to 2.84)                 | 1.13 (0.44 to 2.89)                 |
| Subjective financial status                |                                                |                                           |                                     |                                     |
| Struggling or in poverty                   | 8 (3.9)                                        | 2.4 (−0.3 to 5.0)                         | 2.43 (1.12 to 5.24)                 | 1.87 (0.84 to 4.16)                 |
| Well-off, average, or varied               | 49 (1.5)                                       | Ref.                                      | Ref.                                | Ref.                                |
| Sexual identity                            |                                                |                                           |                                     |                                     |
| Heterosexual                               | 37 (1.5)                                       | Ref.                                      | Ref.                                | Ref.                                |
| Sexual minority                            | 19 (2.4)                                       | 0.9 (−0.3 to 0.2)                         | 1.63 (0.93 to 2.86)                 | 1.22 (0.62 to 2.40)                 |
| Prefer not to disclose <sup>d</sup>        | 2 (1.4)                                        | 0.1 (−1.9 to 2.1)                         | 1.04 (0.25 to 4.38)                 | 0.99 (0.22 to 4.38)                 |
| Gender identity                            |                                                |                                           |                                     |                                     |
| Male or masculine                          | 17 (1.1)                                       | Ref.                                      | Ref.                                | Ref.                                |
| Female or feminine                         | 31 (1.9)                                       | 0.8 (−0.07 to 1.6)                        | 1.70 (0.94 to 3.09)                 | 1.49 (0.90 to 2.77)                 |
| Transgender, nonbinary                     | 7 (3.8)                                        | 2.7 (−0.1 to 5.6)                         | 3.54 (1.44 to 8.71)                 | 3.15 (1.08 to 9.21)                 |
| Prefer not to disclose <sup>d</sup>        | 2 (1.6)                                        | 0.5 (−1.8 to 2.7)                         | 1.51 (0.34 to 6.67)                 | 1.21 (0.25 to 5.75)                 |
| Tobacco product use <sup>e</sup>           |                                                |                                           |                                     |                                     |
| Dual use combustible or noncombustible     | 10 (18.2)                                      | 17.6 (7.5 to 27.8)                        | 41.1 (17.8 to 94.8)                 | 34.8 (14.0 to 86.4)                 |
| Exclusive combustible tobacco <sup>d</sup> | 2 (13.3)                                       | 12.8 (−4.4 to 30.0)                       | 28.5 (5.96 to 136)                  | 28.3 (5.55 to 144)                  |
| Exclusive noncombustible tobacco           | 30 (10.6)                                      | 10.0 (6.4 to 13.6)                        | 21.9 (11.9 to 40.2)                 | 20.9 (10.7 to 40.7)                 |
| Never use                                  | 17 (0.54)                                      | Ref.                                      | Ref.                                | Ref.                                |
| Any combustible tobacco                    | 12 (17.1)                                      | 16.6 (7.8 to 25.4)                        | 38.3 (17.5 to 83.8)                 | 33.4 (14.4 to 77.6)                 |
| Never use                                  | 17 (0.54)                                      | Ref.                                      | Ref.                                | Ref.                                |
| Any noncombustible tobacco                 | 40 (11.8)                                      | 11.3 (7.8 to 14.7)                        | 24.7 (13.9 to 44.2)                 | 23.2 (12.2 to 43.9)                 |
| Never use                                  | 17 (0.54)                                      | Ref.                                      | Ref.                                | Ref.                                |

<sup>a</sup>Use of nicotine pouches or nontherapeutic nicotine gums, lozenges, tablets, and/or gummies.

<sup>b</sup>Estimate of association with ever versus never oral nicotine use from generalized linear mixed models accounting for clustering with schools.

<sup>c</sup>Adjusted model includes all sociodemographic factors as simultaneous regressors.

<sup>d</sup>Regression estimates should be interpreted with caution due to events <5 among exclusive combustible tobacco users.

<sup>e</sup>Combustible tobacco includes combustible cigarettes, hookah/waterpipe, little cigars or cigarillos, big cigars. Noncombustible tobacco includes e-cigarettes and snus.
